# Supplementary material for: Genetic profile of GNAQ-mutated blue melanocytic neoplasms reveals mutations in genes linked to genomic instability and the PI3K pathway
Source: PubMed Central journal article supplement (PMC5053711; doi:10.18632/oncotarget.8578), 2016-04-04
Supplement: oncotarget-07-28086-s001.pdf [file oncotarget-07-28086-s001.pdf]

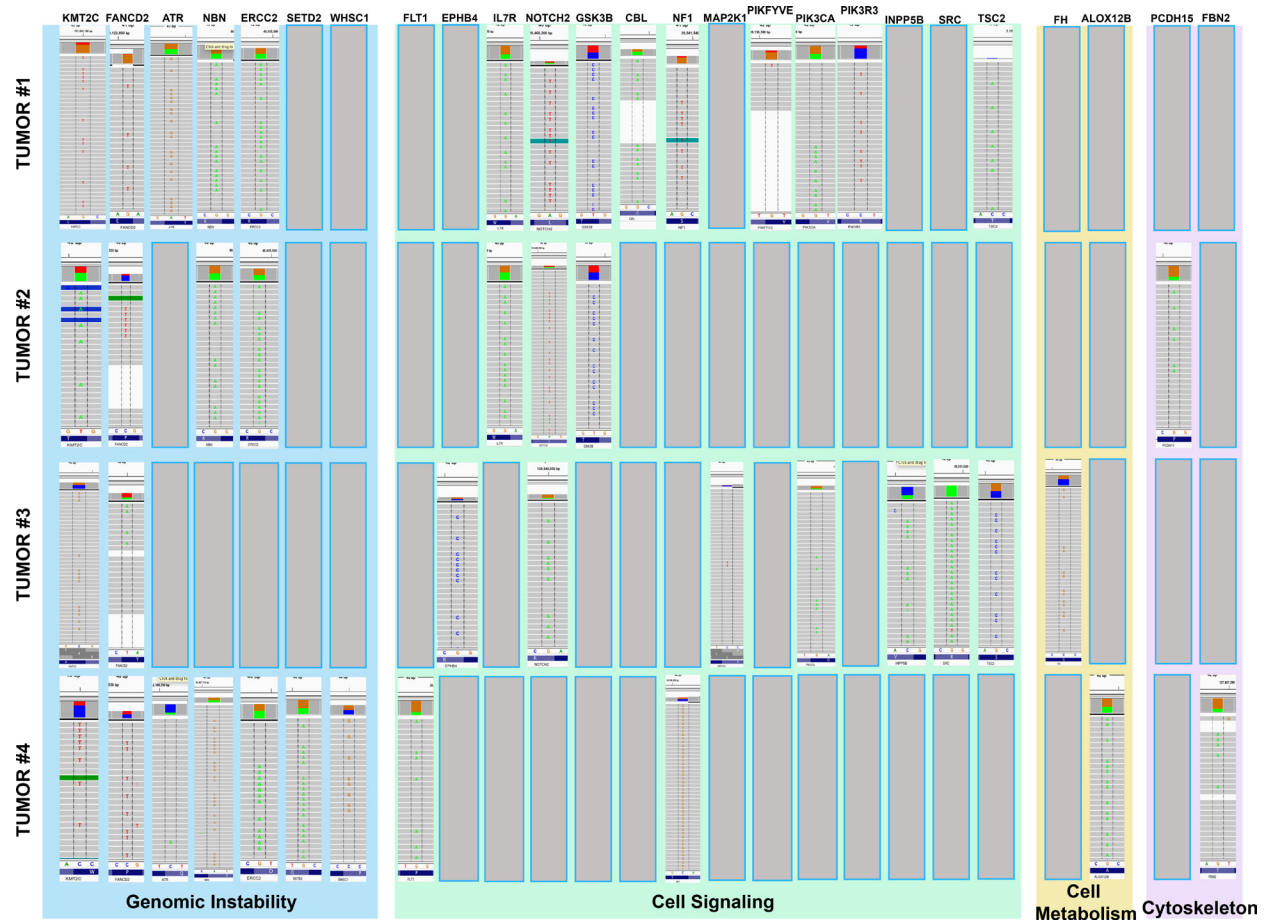

**Supplementary Figure S2: Images of the IGV genome browser view of the reads from the non-synonymous mutations identified by deep sequencing.** Genes are grouped according the biological process they are involved in. Blue: genomic instability, Green: Cell signaling, Yellow: cell metabolism, Purple: Cytoskeleton. Grey rectangle: wild type gene.

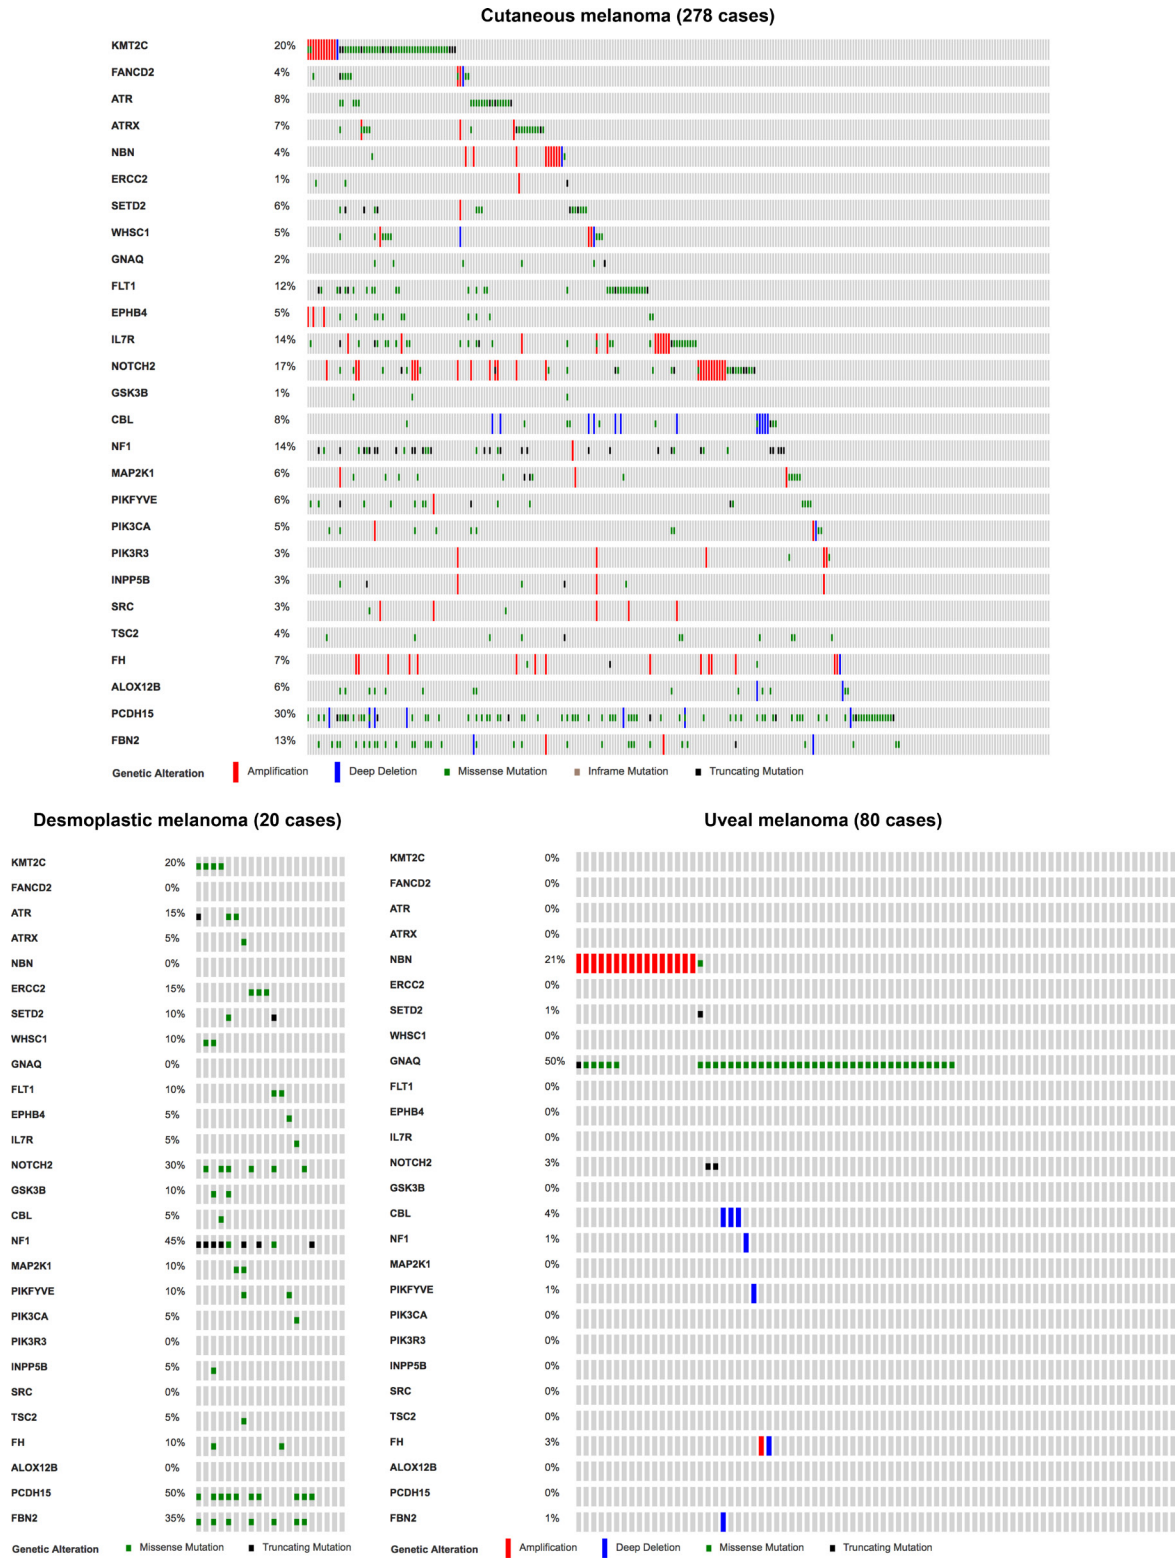

**Supplementary Figure S3: Identified mutated genes are also mutated in cutaneous melanoma, desmoplastic melanoma and uveal melanoma.** Mutated genes identified in MABN samples at a frequency >20% were analyzed using the TCGA database (cBioportal for cancer genomics; <http://www.cbioportal.org>). Results for the different melanoma subtypes and the number of cases in each group are shown.

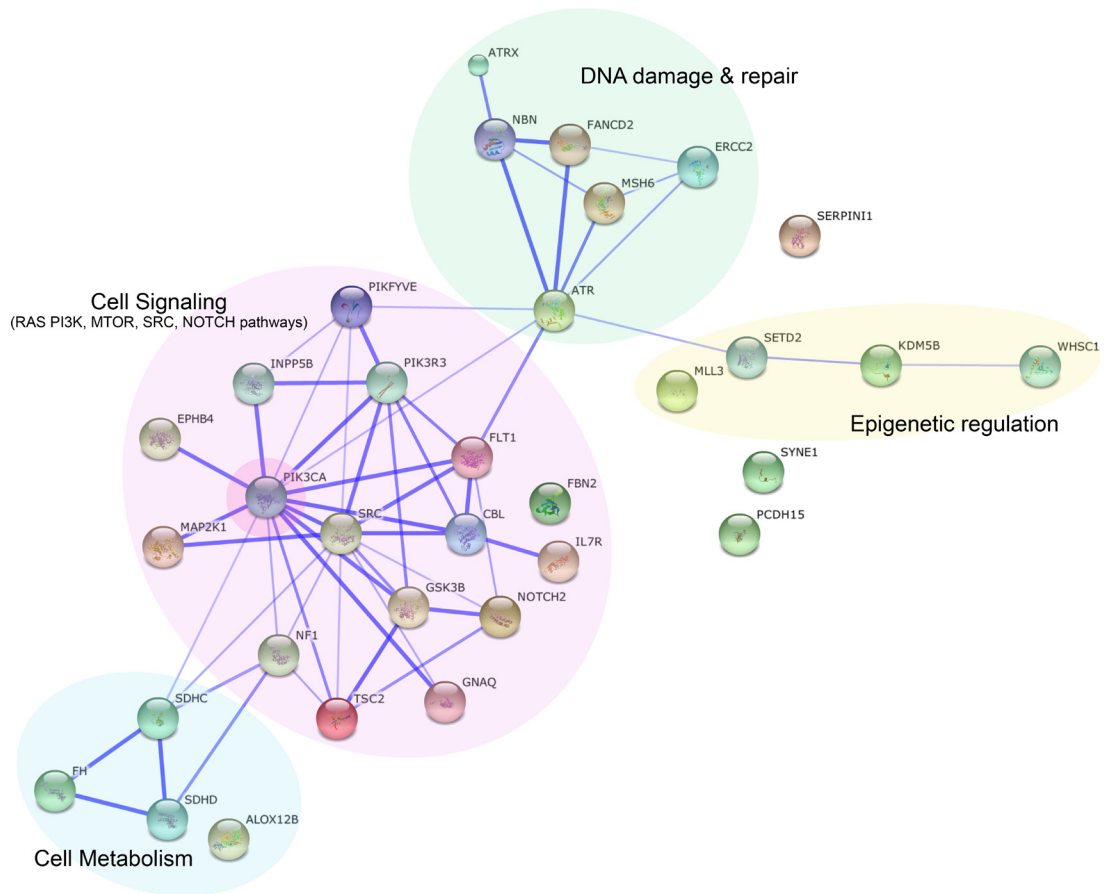

**Supplementary Figure S4: Known and predicted protein-protein interactions.** Association among the mutated genes detected in melanoma associated to blue nevus samples (STRING, Search Tool for the Retrieval of Interacting Genes/Proteins, <http://string-db.org/newstring.cgi>). This is the confidence view. Stronger associations are represented by thicker lines.

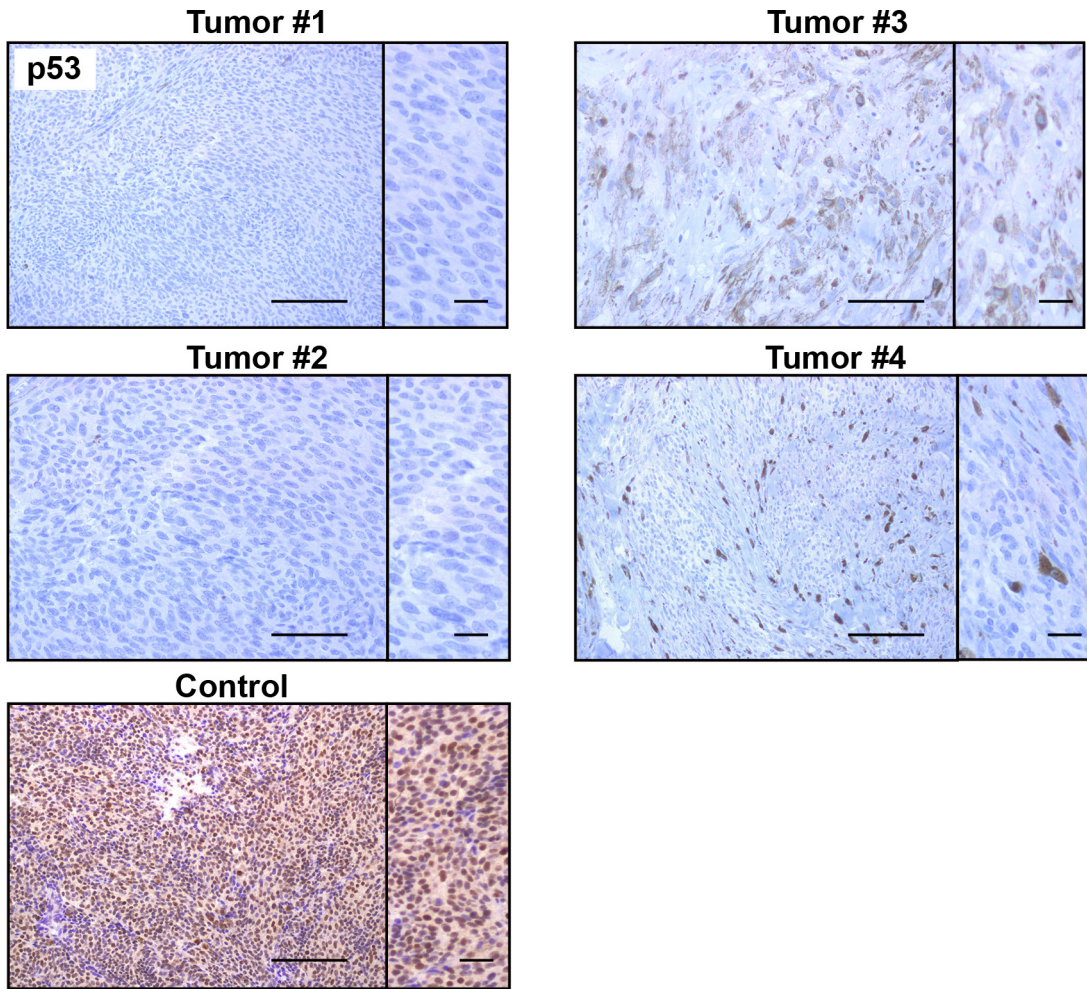

Supplementary Figure S5: Tumors samples were stained with p53 antibody. A tumor control for the staining is showed.



Supplementary Table S2: Genes investigated by Haloplex exon sequencing

## Genes in Haloplex panel:

|          |          |          |        |          |        |         |          |          |          |
|----------|----------|----------|--------|----------|--------|---------|----------|----------|----------|
| ABCA12   | BRIP1    | DKK2     | FAM46C | HNF1A    | LGR6   | NCOA2   | PKM2     | SERPINB1 | TMPRSS2  |
| ABCA7    | BUB1B    | DKK3     | FANCA  | HRAS     | LRP1B  | NEB     | PLK2     | SERPINB2 | TNFAIP3  |
| ABL1     | CARD11   | DKK4     | FANCC  | HSP90AA1 | LRP5   | NF1     | PLK3     | SERPINB3 | TNFRSF14 |
| ABL2     | CASP8    | DMD      | FANCD2 | IDH1     | MAGI2  | NF2     | PMS1     | SERPINB4 | TOP1     |
| ACVR1B   | CBL      | DNAH5    | FANCE  | IDH2     | MAP2K1 | NFE2L2  | PMS2     | SERPINB5 | TP53     |
| ACVR2A   | CBLB     | DNM2     | FANCF  | IGF1R    | MAP2K2 | NFKB1   | PNRC1    | SERPINE1 | TP63     |
| ADAMTS20 | CBLC     | DNMT1    | FANCG  | IGFBP7   | MAP2K4 | NFKB2   | POLE     | SERPINI1 | TSC1     |
| AFF2     | CCND1    | DNMT3A   | FAS    | IKBKE    | MAP3K5 | NKX2-1  | PPP2R1A  | SERPINI2 | TSC2     |
| AKT1     | CCNE1    | DNMT3B   | FBN1   | IKZF1    | MAP3K8 | NOTCH1  | PRDM1    | SETD2    | TSHR     |
| AKT2     | CD79B    | DOCK2    | FBN2   | IL7R     | MAP3K9 | NOTCH2  | PREX2    | SF3B1    | U2AF1    |
| AKT3     | CDC27    | DPP6     | FBXO11 | INSR     | MAP7   | NOTCH3  | PRKAR1A  | SHQ1     | VHL      |
| ALK      | CDC42EP2 | ECT2L    | FBXW7  | IRS1     | MAPK12 | NOTCH4  | PRKCI    | SKI      | WAS      |
| ALOX12B  | CDC73    | EDNRB    | FGFR1  | IRS2     | MCL1   | NPM1    | PTCH1    | SKIL     | WBSCR17  |
| APC      | CDH1     | EGFR     | FGFR2  | JAK1     | MDM2   | NRAS    | PTEN     | SLC16A4  | WHSC1    |
| AR       | CDH10    | EIF4EBP1 | FGFR3  | JAK2     | MDM4   | NSD1    | PTPN11   | SLC9A9   | WHSC1L1  |
| ARAF     | CDK12    | EP300    | FGFR4  | JAK3     | MEN1   | NTRK1   | PTPN12   | SMAD2    | WRN      |
| ARHGAP26 | CDK4     | EPC1     | FH     | JUN      | MET    | NTRK2   | PTPRD    | SMAD3    | WT1      |
| ARID1A   | CDK5     | EPHA3    | FLCN   | KAT6A    | MIER3  | NTRK3   | PTPRS    | SMAD4    | XIRP2    |
| ARID1B   | CDK6     | EPHA5    | FLT1   | KAT6B    | MITF   | OR10R2  | PXDN     | SMAD7    | XPA      |
| ARID2    | CDK8     | EPHA6    | FLT3   | KDM1A    | MLH1   | PAK7    | RAD51    | SMARCA4  | XPC      |
| ASXL1    | CDKN2A   | EPHA7    | FMN2   | KDM2A    | MLH3   | PALB2   | RAF1     | SMARCB1  | XPO1     |
| ATM      | CDKN2B   | EPHA8    | FOXL2  | KDM2B    | MLL    | PARK2   | RARA     | SMO      | YAP1     |
| ATP6V0D2 | CDKN2C   | EPHB1    | FUBP1  | KDM3B    | MLL2   | PARP1   | RASA1    | SOCS1    | YES1     |
| ATR      | CEBPA    | EPHB4    | FZD3   | KDM4A    | MLL3   | PAX5    | RASA2    | SOX2     | ZIM2     |
| ATRX     | CHEK1    | EPHB6    | GATA1  | KDM4B    | MLST8  | PBRM1   | RASA3    | SPOP     | ZNRF3    |
| AURKA    | CHEK2    | ERBB2    | GATA2  | KDM4C    | MPL    | PCDH15  | RASA4    | SRC      | ZRSR2    |
| AXIN1    | CIC      | ERBB3    | GATA3  | KDM5A    | MSH2   | PDGFRA  | RB1      | SRSF2    |          |
| AXIN2    | CREBBP   | ERBB4    | GNA11  | KDM5B    | MSH3   | PDGFRB  | RECQL4   | STK11    |          |
| BAI3     | CRKL     | ERCC2    | GNAQ   | KDM5C    | MSH6   | PDZRN3  | REL      | SUFU     |          |
| BAP1     | CRLF2    | ERCC3    | GNAS   | KDM6A    | MTOR   | PHF6    | RET      | SYNE1    |          |
| BARD1    | CSF1R    | ERCC4    | GOLPH3 | KDM6B    | MUC16  | PHOX2B  | RICTOR   | TBK1     |          |
| BCL2L1   | CSMD1    | ERCC5    | GPC3   | KDM8     | MUTYH  | PIK3C2G | RNF43    | TCERG1   |          |
| BCL6     | CTNNA2   | ERG      | GPC6   | KDR      | MYB    | PIK3CA  | RPTOR    | TCF7L2   |          |
| BCOR     | CTNNB1   | ESR1     | GRIK3  | KEAP1    | MYC    | PIK3CB  | RUNX1    | TEK      |          |
| BIRC2    | CYLD     | ETV1     | GRIN2A | KIT      | MYCL1  | PIK3CD  | SBDS     | TERT     |          |
| BLM      | DAXX     | ETV6     | GSK3B  | KLF6     | MYCN   | PIK3CG  | SCN5A    | TET1     |          |
| BMPR1A   | DDR2     | EXT1     | H3F3A  | KLHDC4   | MYD88  | PIK3R1  | SDHB     | TET2     |          |
| BRAF     | DICER1   | EXT2     | HDAC2  | KRAS     | MYO1B  | PIK3R2  | SDHC     | TET3     |          |
| BRCA1    | DIS3     | EZH2     | HIF1A  | LDHA     | NALCN  | PIK3R3  | SDHD     | TGFBR1   |          |
| BRCA2    | DKK1     | FAM123B  | HMGA2  | LEFTY1   | NBN    | PIM1    | SERPINA9 | TGFBR2   |          |

Supplementary Table S3: List of genes mutated identified by haloplex-exon sequencing in blue melanocytic neoplasms

|         | Freq.  | Freq.  | Freq.  | Freq.  | Nucl. Ref | Nucl. Var | Polyphen |
|---------|--------|--------|--------|--------|-----------|-----------|----------|
| ABCA12  | 14.04% | -      | -      | -      | G         | A         | 0.032    |
| ACVR2A  | 10.37% | 6%     | -      | -      | G         | A         | 1        |
| ALOX12B | -      | -      | -      | 42.11% | G         | A         | 0.02     |
| APC     | 8.05%  | -      | -      | -      | -         | -         | -        |
| ARID1A  | 7.69%  | -      | -      | -      | -         | -         | -        |
| ARID1B  | -      | -      | 7.10%  | -      | C         | T         | 0.948    |
| ATP6V0D | 14.81% | -      | -      | -      | C         | A         | 0.211    |
| ATR     | 10.10% | -      | -      | 22.03% | C         | A         | 0.984    |
| ATRX    | 7.59%  | 20.83% | -      | -      | C         | A         | 0.803    |
| BARD1   | -      | 11.11% | -      | -      | G         | T         | 0.014    |
| BRCA1   | 7.94%  | -      | -      | 8.84%  | -         | -         | -        |
| BRCA2   | 11.79% | -      | -      | -      | -         | -         | -        |
| BRIP1   | -      | 7.02%  | -      | -      | C         | T         | 0.001    |
| CARD11  | -      | 10.93% | -      | -      | G         | A         | 0.999    |
| CBL     | 56.67% | -      | -      | -      | G         | A         | 0.763    |
| CHEK1   | -      | -      | -      | 8.18%  | G         | A         | 0.011    |
| CHEK2   | 13.70% | 12.35% | -      | -      | T         | G         | 0.032    |
| CSMD1   | 9.16%  | -      | -      | 7.77%  | -         | -         | -        |
| CTNNB1  | 11.04% | -      | -      | -      | C         | T         | 0.996    |
| DIS3    | 9.85%  | -      | -      | -      | -         | -         | -        |
| DNMT3A  | -      | -      | -      | 12.12% | G         | A         | 0.999    |
| EGFR    | -      | -      | -      | 8.40%  | A         | G         | 0.999    |
| EPC1    | -      | -      | -      | 8.56%  | G         | T         | 0.035    |
| EPHB4   | -      | -      | 46.56% | 9.23%  | G         | C         | 0.977    |
| ERBB4   | 8.60%  | -      | -      | -      | T         | G         | 0.966    |
| ERCC2   | 45.54% | 46.97% | -      | -      | T         | G         | -        |
| ERCC3   | 7.86%  | -      | -      | -      | G         | T         | 0.685    |
| ERCC5   | 8.53%  | -      | -      | -      | G         | A         | 0.734215 |
| ERG     | 9.17%  | -      | -      | -      | C         | A         | 0.015    |
| EZH2    | 11.40% | -      | -      | -      | C         | T         | 0        |
| FANCD2  | 35.00% | 23.00% | 30.44% | 8.14%  | -         | -         | -        |
| FBN1    | 12.12% | -      | -      | -      | C         | T         | 0.998    |
| FBN2    | -      | -      | -      | 24.49% | G         | A         | 0.738    |
| FBXW7   | -      | -      | -      | 13.19% | G         | A         | 1        |
| FGFR1   | -      | -      | -      | 10.70% | G         | T         | 0.281    |
| FGFR2   | 7.33%  | -      | -      | -      | C         | T         | 0.08     |
| FH      | -      | -      | 37.22% | -      | C         | G         | 0.012    |
| FLT1    | 7.38%  | -      | -      | 20.69% | -         | -         | -        |
| FMN2    | 10.26% | -      | -      | -      | C         | T         | 0.6753   |
| FZD3    | 7.77%  | -      | -      | -      | C         | T         | 0.999    |
| GNAQ    | 48.00% | 40%    | 43%    | 28.00% | T         | A         | 0.999    |
| GSK3B   | 46.57% | 50.90% | -      | -      | T         | C         | 0        |
| IDH1    | -      | -      | 7.21%  | -      | G         | C         | 0        |
| IL7R    | 34.71% | 54.97% | -      | -      | G         | A         | 0.735    |
| IMPA1   | 7.73%  | -      | -      | -      | C         | T         | 0.273    |
| INPP5B  | 7.86%  | -      | 30.80% | -      | -         | -         | -        |
| IRS2    | -      | 7.89%  | -      | -      | C         | T         | 0.882    |
| JAK3    | -      | -      | -      | 7.14%  | C         | T         | 0.039    |
| KAT6A   | 8.70%  | -      | -      | -      | G         | T         | 0.755658 |
| KAT6B   | 8.95%  | -      | -      | -      | C         | T         | 0.735396 |
| KDM1A   | -      | -      | 13.22% | -      | C         | T         | 0.058    |
| KDM2A   | 8.06%  | -      | -      | -      | C         | T         | 0.998    |
| KDM3B   | -      | -      | -      | 7.59%  | G         | A         | -        |
| KDM5B   | 8.13%  | -      | -      | -      | C         | A         | 0.998    |
| KDM8    | -      | -      | -      | 8.61%  | C         | T         | 1        |
| KMT2A   | -      | -      | -      | 9.02%  | G         | A         | 0        |
| KMT2C   | 23.81% | 9.26%  | 44.09% | 8.09%  | -         | -         | -        |
| KMT2D   | 16.44% | -      | -      | -      | G         | A         | 0        |
| LRP5    | 13.04% | -      | -      | -      | C         | T         | 1        |
| MAGI2   | 11.81% | -      | -      | -      | C         | A         | 0.194    |
| MAP2K1  | -      | -      | 23.28% | -      | C         | T         | 0.384    |
| MAP2K2  | -      | -      | 19.79% | -      | C         | T         | 0        |
| MAP2K4  | -      | 9.94%  | -      | -      | C         | A         | 0.063    |
| MET     | 17.09% | -      | -      | -      | G         | T         | 0.999    |
| MSH6    | 24.60% | 27.40% | 13.68% | 6.46%  | -         | -         | -        |
| NALCN   | -      | 7.06%  | -      | -      | C         | A         | 1        |
| NBN     | 37.98% | 45.83% | -      | -      | G         | A         | 0.657    |
| NF1     | 15.71% | -      | -      | 43.49% | C         | G         | 0.989    |
| NOTCH2  | -      | -      | 22%    | -      | G         | A         | 0.709    |
| NSD1    | -      | -      | -      | 18.33% | G         | A         | 0.995    |
| NTRK2   | -      | -      | 10.93% | -      | A         | C         | 0.995    |
| PBRM1   | 11.49% | -      | -      | -      | G         | A         | 0.793    |
| PCDH15  | -      | 22.64% | -      | -      | G         | A         | 0.999    |
| PIK3CA  | 38.20% | -      | 25.88% | -      | G         | A         | -        |
| PIK3CB  | 7.35%  | -      | -      | -      | C         | T         | 1        |
| PIK3R3  | 25%    | -      | -      | -      | C         | T         | 0        |
| PIKFYVE | 21.15% | -      | -      | -      | G         | T         | 0.999    |
| PKM     | -      | -      | 7.90%  | -      | A         | T         | 0.998    |
| PMS1    | 8.98%  | -      | -      | -      | C         | A         | 0.123    |
| PPIP5K2 | 15.17% | 10.29% | -      | -      | C         | A         | 0.123    |
| PRKCI   | -      | 10.40% | -      | -      | G         | A         | 0.435    |
| RASA4   | -      | -      | -      | 13.36% | C         | T         | 0.007    |
| RB1     | 14.81% | -      | -      | -      | C         | T         | 0.003    |
| RICTOR  | 7.94%  | -      | -      | -      | G         | T         | 0.796    |
| SERPINB | 12.55% | -      | -      | -      | C         | T         | 0.825    |
| SETD2   | -      | -      | -      | 40.32% | G         | A         | -        |
| SMAD2   | -      | 11.22% | 8.09%  | -      | G         | A         | 0.513    |
| SOX2    | -      | -      | -      | 12.09% | G         | A         | 0        |
| SRC     | -      | -      | 99.81% | -      | G         | A         | 0.999    |
| SYNE1   | 20.27% | 9.52%  | -      | -      | T         | C         | 0.033    |
| TGFB1   | -      | 7.01%  | -      | -      | C         | A         | 0.033    |
| TSC2    | 17.36% | -      | 46.68% | -      | G         | C         | 0.958    |
| WHSC1   | -      | -      | -      | 48.65% | C         | G         | 0.721    |
| XIRP2   | 10.16% | -      | -      | -      | G         | A         | 0.24     |

Variant allele frequency, nucleotide in the allele variant and polyphen are shown. Genes mutated all samples are colored in gray
